# Supplementary material for: Highly dispersed Pt catalyst supported on nanoporous carbon derived from waste PET bottles for reductive alkylation
Source: Royal Society of Chemistry journal article supplement (doi:10.1039/c9ra04976b), 2019-01-01
Supplement: c9ra04976b1.pdf [file c9ra04976b1.pdf]

## Supporting Information

Manuscript title: Highly dispersed Pt catalyst supported on nanoporous carbon derived from waste PET bottles for reductive alkylation

**Table S1.** Oxygen-containing functional groups on various NPCs supported Pt catalysts<sup>a</sup>

| Samples                 | Carboxyl/<br>mmolg <sup>-1</sup> | Lactone/<br>mmolg <sup>-1</sup> | Hydroxyl /<br>mmolg <sup>-1</sup> | Total acid /<br>mmolg <sup>-1</sup> |
|-------------------------|----------------------------------|---------------------------------|-----------------------------------|-------------------------------------|
| Pt/NPC15(1/1)-CPA       | 0.016                            | 0.031                           | 0.062                             | 0.109                               |
| Pt/O@NPC15(1/1)-PTA     | 0.743                            | 0.075                           | 0.720                             | 1.538                               |
| Pt/NPC50(1/1)-CPA       | 0.022                            | 0.018                           | 0.048                             | 0.088                               |
| Pt/O@NPC50(1/1)-PTA     | 0.655                            | 0.102                           | 0.530                             | 1.287                               |
| Pt/NPC100(1/1)-CPA      | 0.008                            | 0.044                           | 0.083                             | 0.135                               |
| Pt/O@NPC100(1/1)-PTA    | 0.681                            | 0.093                           | 0.662                             | 1.436                               |
| Pt/O@PVA-NPC50(1/1)-PTA | 0.863                            | 0.117                           | 0.442                             | 1.422                               |

<sup>a</sup> The quantification of the oxygen-containing functional groups on catalysts was carried out by Boehm Titration.

**Fig. S1.** Nitrogen adsorption isotherm of the NPCs.

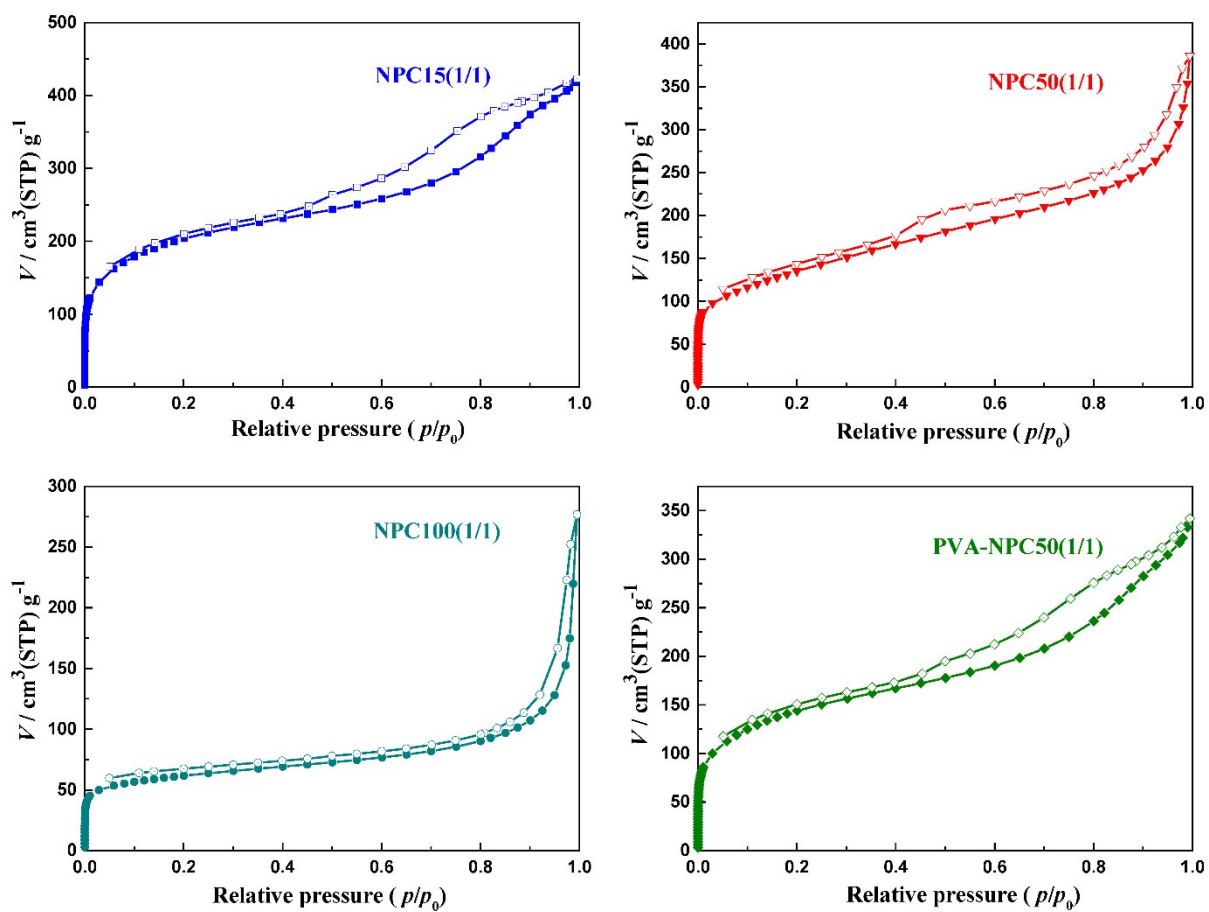

**Fig. S2.** Time vs. Conversion of p-ADPA over the Pt/NPCs<sup>a</sup>

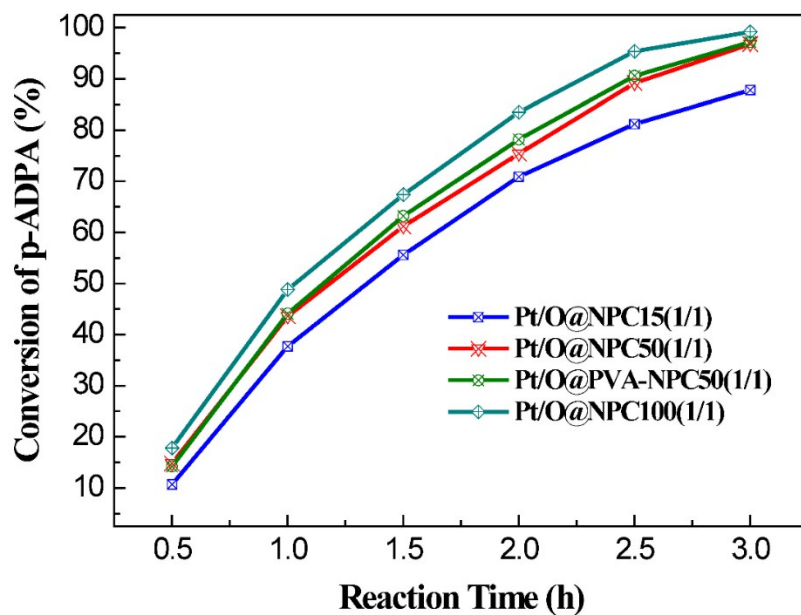

<sup>a</sup> Reaction conditions: p-ADPA = 50 g, MIAK = 120 g, catalyst = 0.5 g, T = 80 °C, P = 2.5 MPa (pure H<sub>2</sub>), reaction time = 3 h, stirring speed = 750 r/min.
